# Supplementary material for: Bismuth-Chitosan Nanocomposite Sensors for Trace Level Detection of Ni(II) and Co(II) in Water Samples
Source: MDPI journal article supplement (doi:10.3390/w14030302), 2022-01-20
Supplement: s1 [file s1]

## Supplementary Informaiton

### Bismuth-chitosan nanocomposite sensors for trace level detection of Ni(II) and Co(II) in water samples

Mohsen Pilevar<sup>1</sup>, Jae-Hoon Hwang<sup>1</sup>, Jordan Stanberry<sup>2</sup>, Vasileios Anagnostopoulos<sup>2</sup>, Karin Y. Chumbimuni-Torres<sup>2</sup>, Woo Hyoung Lee\*

<sup>1</sup> Department of Civil, Environmental, and Construction Engineering, University of Central Florida, Orlando, FL 32816, USA

<sup>2</sup> Department of Chemistry, University of Central Florida, Orlando, FL 32816, USA

\*Corresponding author: Woo Hyoung Lee, Ph.D., P.E., Assistant Professor, Department of Civil, Environmental, and Construction Engineering, University of Central Florida, Orlando, FL 32816-2450, phone: 407-823-5304, fax: 407-823-3315, email: woohyoung.lee@ucf.edu

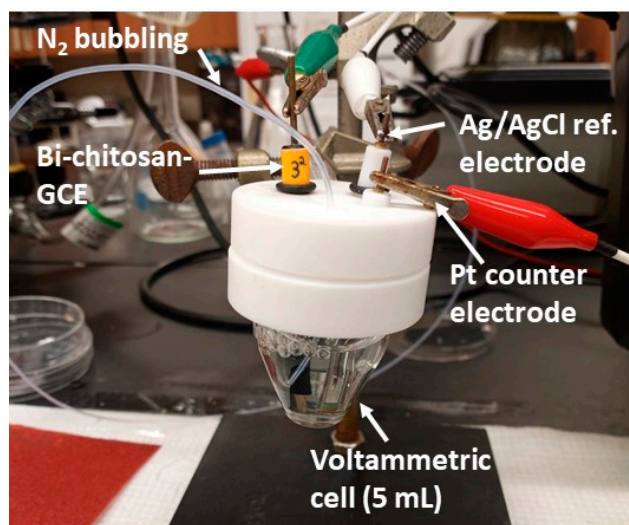

**Figure S1.** Experimental setup for electrochemical detection of Ni(II) and Co(II) using SWAdCSV technique.

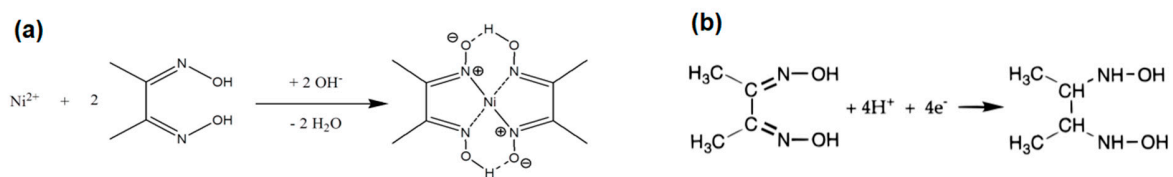

**Figure S2.** Schematic illustration of (a) metal-chelate complex formation, (b) reduction of glyoxime ligands [33,46].

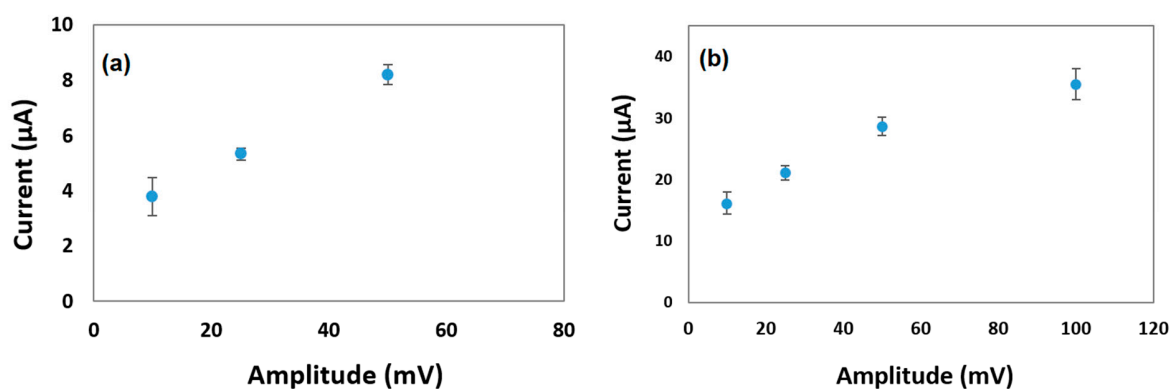

**Figure S3.** Optimization of amplitude in the detection of: (a) Ni(II), (b) Co(II). SWAdCSV was performed in 0.1 M ammonia buffer solution at pH 9.2 containing 50  $\mu\text{g L}^{-1}$  of Ni(II) or Co(II).

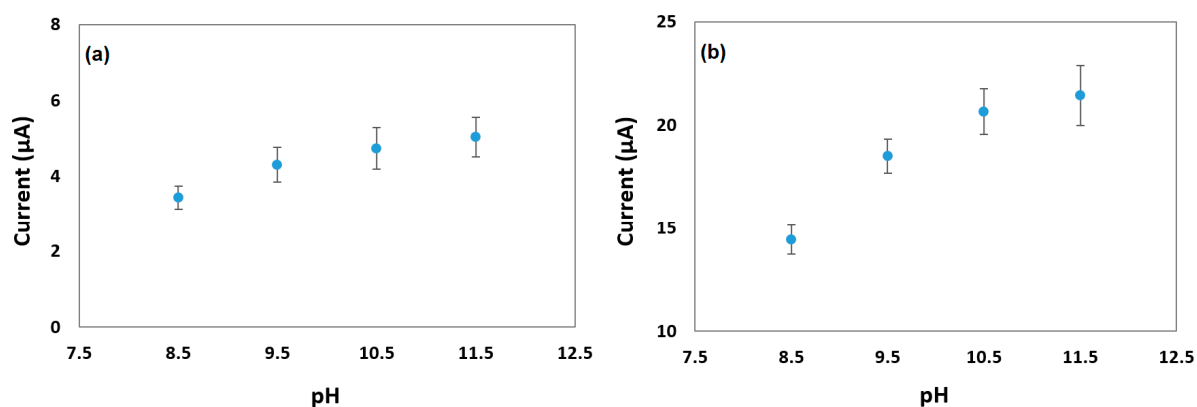

**Figure S4.** Impact of electrolyte pH on the stripping peak currents of (a) Ni(II) and (b) Co(II). Ni(II) and Co(II) concentration was fixed at 35  $\mu\text{g L}^{-1}$ .

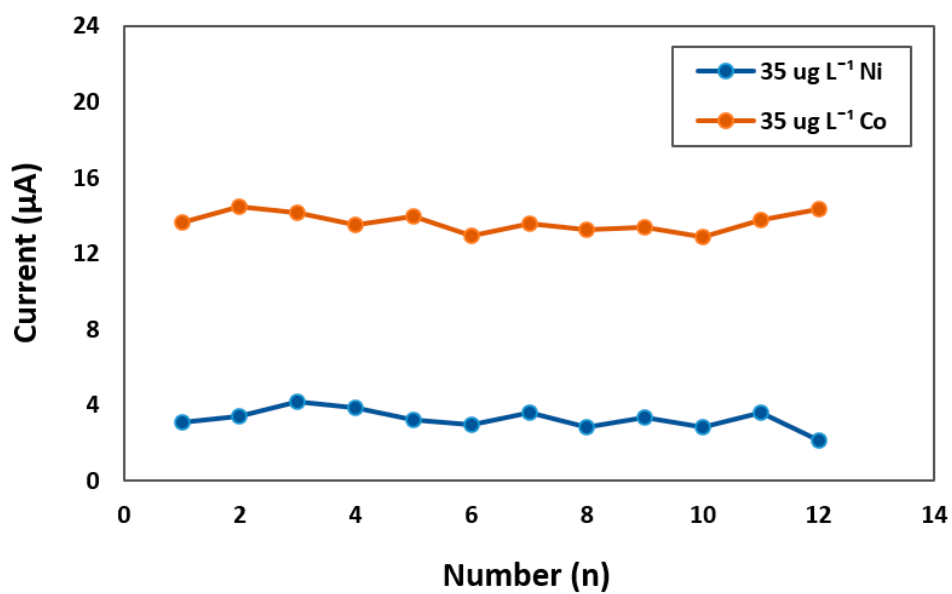

**Figure S5.** Reproducibility of the Bi-chitosan nanocomposite sensor for the detection of Ni(II) and Co(II) in the natural water samples.

**Table S1.** Optimal SWAdCSV operational conditions for Ni and Co measurements using Bi-chitosan coated sensor

| Metal ion | Deposition potential (V) | Frequency (Hz) | Amplitude (mV) | DMG concentration (mM) | Deposition time (s) |
|-----------|--------------------------|----------------|----------------|------------------------|---------------------|
| Ni(II)    | -0.9                     | 120            | 50             | 0.2                    | 120                 |
| Co(II)    | -0.7                     | 60             |                |                        |                     |

**Table S2.** Optimum values for fitted equivalent circuit elements for Bi-chitosan-GCE EIS measurement data

| Parameters     | Upper limit | Lower limit | Results    | Error (%) |
|----------------|-------------|-------------|------------|-----------|
| R <sub>1</sub> | 1000000     | 0           | 822.78     | 7.8918    |
| R <sub>2</sub> | 1000000     | 0           | 2.5428e05  | 1.6044    |
| W <sub>1</sub> | 10000000    | 0           | 0.14447    | -         |
| P <sub>1</sub> | 0.0005      | 0           | 9.6454e-06 | 1.7855    |
| n <sub>1</sub> | 1           | 0           | 0.58657    | 0.74959   |

**Table S3.** Summary of sensor performance in ammonia buffer solution and natural water sample

| Metal ion | Sample type    | LOD ( $\mu\text{g L}^{-1}$ ) | Sensitivity ( $\mu\text{A}/\mu\text{g L}^{-1}$ ) | RSD * (%) | Linear range ( $\mu\text{g L}^{-1}$ ) |
|-----------|----------------|------------------------------|--------------------------------------------------|-----------|---------------------------------------|
| Ni(II)    | Ammonia buffer | 3.67                         | 0.119                                            | 3.2       | Up to 100                             |
|           | Natural water  | 5.02                         | 0.098                                            | 7.7       | Up to 50                              |
| Co(II)    | Ammonia buffer | 2.42                         | 0.552                                            | 2.9       | Up to 100                             |
|           | Natural water  | 3.25                         | 0.458                                            | 6.5       | Up to 50                              |

\* Relative standard deviation
