# Supplementary material for: Bismuth-Chitosan Nanocomposite Sensors for Trace Level Detection of Ni(II) and Co(II) in Water Samples
Source: MDPI journal article supplement (doi:10.3390/w14030302), 2022-01-20
Supplement: s1 [file s1]

Archive with 1 entries (1 files):
- water-1532561-supplementary.pdf
